# Supplementary material
Source: Springer Nature journal article supplement (https://www.springermedizin.de/resource/supplementary/13014_2012_803_MOESM4_ESM.pdf/9634764)

# *Lig4*<sup>-/-</sup> MEFs

## A

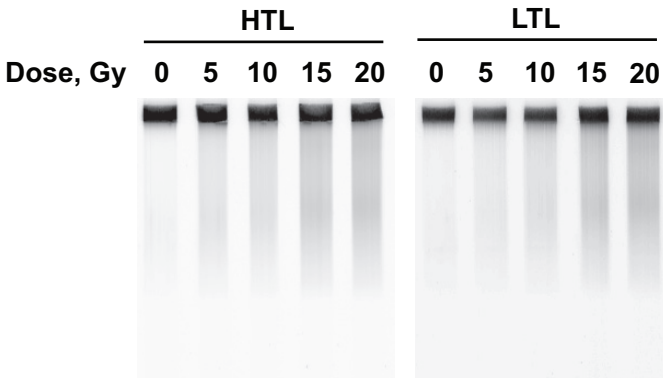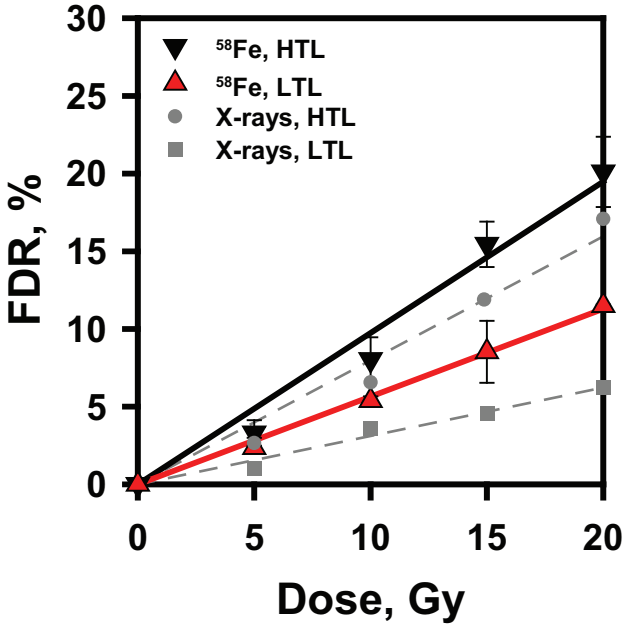

## B

IR → LTL → Treatment at shown temperature in TEN → PFGE

### *M059K*

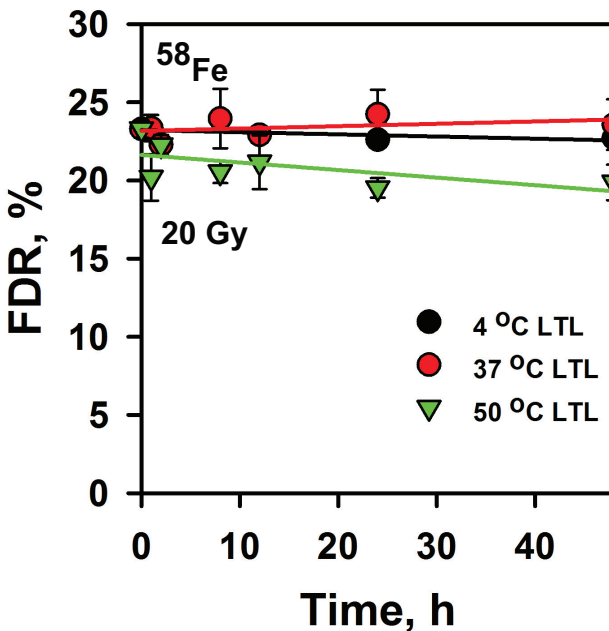

Supplement: MOESM4 [file 9634764]
